# Supplementary material
Source: publisher figshare collection journal article supplement (https://acs.figshare.com/ndownloader/files/28624551)
Supplement: Supplementary file 1 [file 28624551]

## ***Can an inorganic coating serve as stable SEI for aqueous superconcentrated electrolytes?***

*Léa Droguet,<sup>a,b,c,\$</sup> Gustavo M. Hobold,<sup>d,\$</sup> Marie Francine Lagadec,<sup>a,c</sup> Rui Guo,<sup>d</sup> Christophe Lethien,<sup>c,e,f</sup> Maxime Hallot,<sup>c,e</sup> Olivier Fontaine,<sup>c,g</sup> Jean-Marie Tarascon,<sup>a,b,c</sup> Betar M. Gallant<sup>d,\*</sup> and Alexis Grimaud<sup>a,b,c,\*</sup>*

[a] Chimie du Solide et de l'Energie, UMR 8260, Collège de France, 11 place Marcelin Berthelot, 75231 Paris Cedex 05, France

[b] Sorbonne Université, 4 place Jussieu, 75005 Paris, France

[c] Réseau sur le stockage Electrochimique de l'Energie (RS2E), CNRS FR3459, 33 rue Saint Leu, 80039 Amiens Cedex, France

[d] Department of Mechanical Engineering, Massachusetts Institute of Technology, Cambridge, MA 02139

[e] Université de Lille, CNRS, Centrale Lille, Université Polytechnique Hauts-de-France, UMR 8520 - IEMN, F-59000 Lille, France

[f] Institut Universitaire de France (IUF)

[g] Institut Charles Gerhardt Montpellier, Université Montpellier, UMR 5253, Place Eugène Bataillon, 34095 Montpellier, France

[\$] L.D. and G.M.H. contributed equally to this paper

### **Corresponding Authors**

Alexis Grimaud: alexis.grimaud@college-de-france.fr

Betar M. Gallant: bgallant@mit.edu

## Supporting Information

-Solubility measurements details

-SEM observations

-GC-TCD/FID measurements in LP30 and WiSE-Al<sub>2</sub>O<sub>3</sub> study by E-SEM

-Partial dissolution of LiF-coating layer when soaking in FEC, Li 1s and F 1s XPS measurements

-GC-TCD in WiSE

-Surface chemistry analysis after pre-soaking step, XPS measurements

-Gas calculations

- Solubility measurements

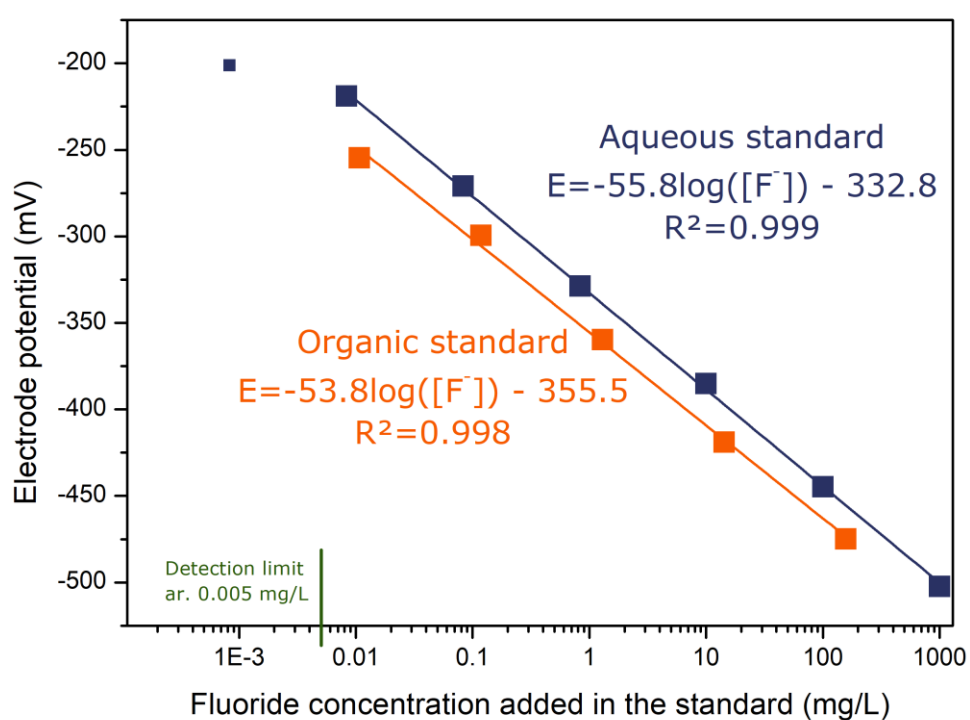

Figure S 1 Calibration curves obtained in aqueous and organic standards.

Table S 1 summarizes the solubility previously reported for LiF in pure solvents, either in alkylcarbonate ones or in water. The solubility of LiF was found to vary according to the solvent. Compared to the solubility of other SEI components such as lithium oxide (Li<sub>2</sub>O) whose

solubility limit is found to be below 0.05 g / L <sup>1</sup>, the solubility of LiF is relatively high in pure solvent.

Table S 1 LiF solubility limit found in literature in various solvents: water, EC, DMC, PC.

| Solvent          | LiF solubility at 25 °C (g / L)                        | LiF solubility at 40 °C (g / L) |
|------------------|--------------------------------------------------------|---------------------------------|
| H <sub>2</sub> O | 1.11 <sup>2</sup>                                      | 1.20 <sup>2</sup>               |
| DMC              | 0.57 <sup>2</sup><br>4 · 10 <sup>-3</sup> <sup>3</sup> |                                 |
| PC               | 0.14 <sup>2</sup>                                      | 0.21 <sup>2</sup>               |
| EC               |                                                        | 5.52 <sup>2</sup>               |

The difference in solubility limit of two orders of magnitude in dimethyl carbonate (DMC) between the two different report is explained by differences in the protocol, especially regarding the filtration technique leading to a colloidal or non-colloidal solution <sup>1</sup>.

- *Solubility decrease with the initial increase of [Li<sup>+</sup>]*

The constant of dissolution of LiF in an aqueous solution can be expressed following the equilibrium described in equation (1):

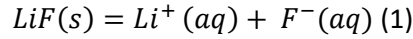

$$K_s = a_{\text{Li}^+} a_{\text{F}^-}$$

$$K_s = \gamma_{\text{Li}^+} [\text{Li}^+] * \gamma_{\text{F}^-} [\text{F}^-]$$

$$K_s = \gamma_{\text{Li}^+} \gamma_{\text{F}^-} * [\text{Li}^+] [\text{F}^-]$$

Furthermore, knowing the following relationship regarding the activity coefficients of ions in solution:

$$\gamma_{\text{Li}^+} \gamma_{\text{F}^-} = \gamma_{\text{Li}^+ \text{F}^-}^2$$

The expression for the constant of dissolution becomes:

$$K_s = \gamma_{\text{Li}^+ \text{F}^-}^2 * [\text{Li}^+] [\text{F}^-]$$

The fluoride and lithium ions concentration can be expressed as follow:

$$[\text{Li}^+] = [\text{Li}^+]_{\text{electrolyte}} + [\text{Li}^+]_{\text{lim}}$$

$$[\text{F}^-] = [\text{F}^-]_{\text{lim}}$$

with  $[\text{Li}^+]_{\text{lim}} = [\text{F}^-]_{\text{lim}}$

Where  $[\text{Li}^+]_{\text{electrolyte}}$  is the initial concentration of Li<sup>+</sup> cation due to the LiTFSI concentration in solution (i.e. 1 mol / kg, 3 m, 5 m, 7 m, 10 m, 15 m, 20 m),  $[\text{F}^-]_{\text{lim}}$  is the solubility limit of fluoride measured by the ISE electrode and  $[\text{Li}^+]_{\text{lim}}$  is the concentration of Li<sup>+</sup> cation added during the LiF dissolution in the electrolyte.

Considering the high initial  $[Li^+]$  in the bulk electrolyte ( $>1$  mol /kg i.e. 0.87 mol / L) and the measured fluoride solubility limit ( $< 1$  g / L i.e. 0.05 mol / L) ,  $[Li^+]$  can be simplified as follow:

$$[Li^+] = [Li^+]_{electrolyte}$$

Therefore,

$$[F^-]_{lim} = \frac{K_s}{\gamma_{Li+F-}^2 * [Li^+]_{electrolyte,initial}} \quad (2)$$

- LiF coating characterization

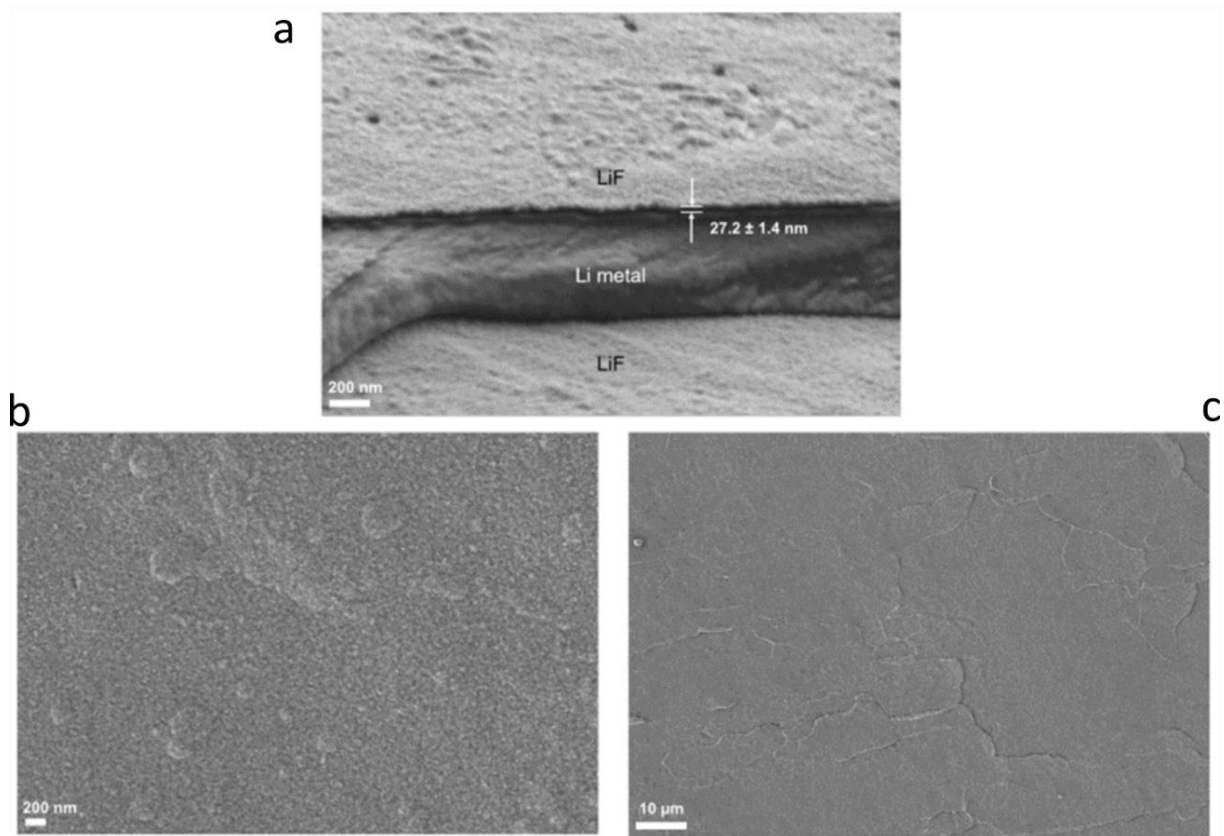

Figure S 2 Scanning electron microscopy (SEM) images (a)Cross section SEM image of a Li/LiF pristine sample. Top-view SEM images of a Li/LiF pristine sample, high magnification (b), low magnification (c).

The thickness of the coating is to be  $27.2 \pm 1.4$  nm. Furthermore, He *et al.* <sup>4</sup> has shown by XRD measurements that Li/LiF films formed using a similar methodology, but with longer reaction times (which allows a thicker coating to grow), are crystalline. Thus, our artificial SEI has a nanoscopic polycrystalline SEI, with comparable thickness to native Li SEIs.

- *LP30 GC-FID gas identification*

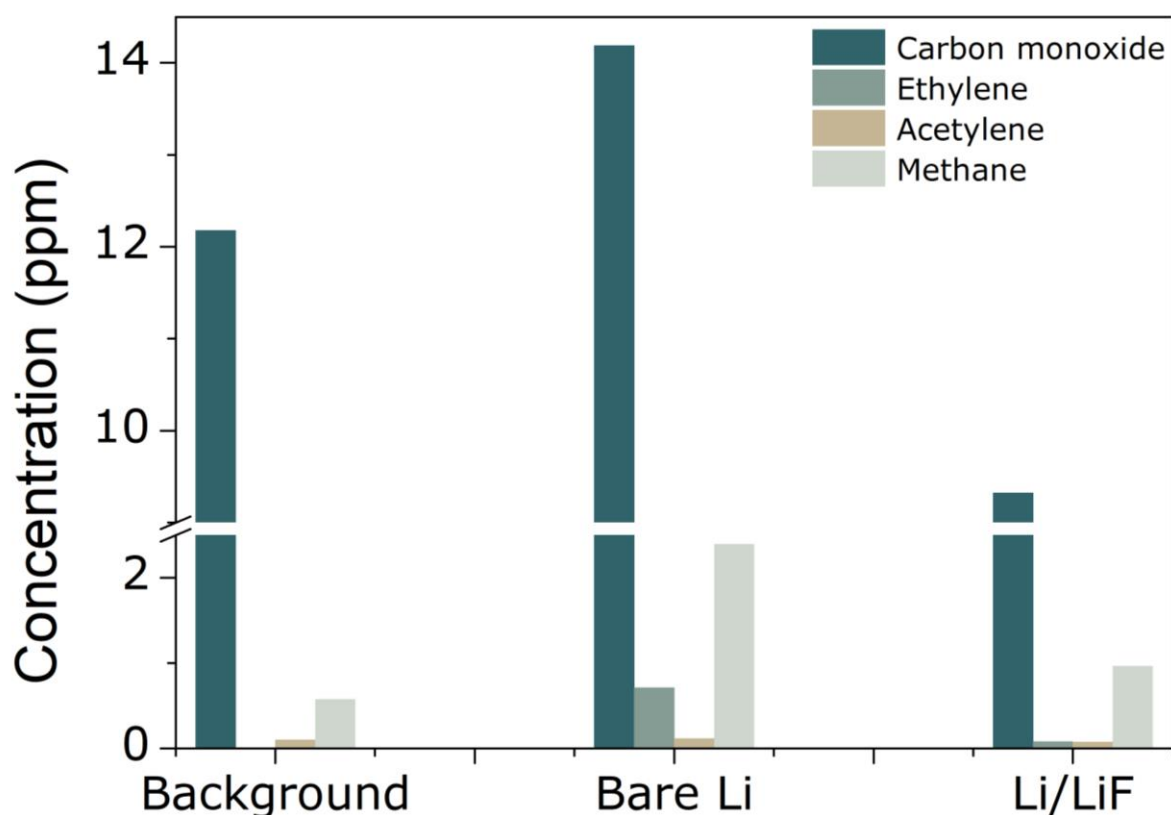

Figure S 3 Concentration in Carbon monoxide (dark blue), ethylene (light blue), acetylene (yellow) and methane (grey) when exposing Li-coated LiF or bare metallic Li samples to LP30 electrolyte during 15 min.

- *Al<sub>2</sub>O<sub>3</sub> coating*

Having established that the major issue facing a native SEI relying on the formation of LiF is the lack of self-passivation observed in aqueous superconcentrated electrolytes rather than the LiF solubility, we explored the protective power of an artificial SEI composed of a conformal Al<sub>2</sub>O<sub>3</sub> layer prepared by atomic layer deposition (ALD) onto metallic Li electrodes. Environmental SEM measurements were first performed on a 2 nm and a 10 nm thick Al<sub>2</sub>O<sub>3</sub>-coated metallic Li sample (Figure S 4a). As seen before exposure to moisture, Al<sub>2</sub>O<sub>3</sub> coating prepared by ALD forms a granular and textured coating on the surface of Li, alike the

microstructure previously reported elsewhere for a similar coating<sup>5</sup>. Nevertheless, when gradually increasing the water partial pressure from 0 to 90 % RH, obvious degradations are observed starting at 30 % RH for the 2 nm thick coating (Figure S 4, top row). Bearing in mind that  $\text{Al}_2\text{O}_3$  does not dissolve in pure water, this change in microstructure from granular to a cauliflower-like can arise from two effects. First,  $\text{Al}_2\text{O}_3$  can gradually transform to  $\text{Al}(\text{OH})_3$ , this phase transformation inducing a change in molar volume (from 403 mol/cm<sup>3</sup> for  $\text{Al}_2\text{O}_3$  to 188.8 mol/cm<sup>3</sup> for  $\text{Al}(\text{OH})_3$ , i.e. a contraction of 6 % in volume). Second, the granular morphology of the  $\text{Al}_2\text{O}_3$  coating itself can induce reactivity of the underneath Li electrode. In other words, the granular morphology of the 2 nm  $\text{Al}_2\text{O}_3$  coating prepared by ALD does not prevent water from accessing Li. Therefore, a thicker coating of 10 nm was then prepared, but similar degradation was observed, with a cauliflower-like structure being formed upon increased relative humidity (Figure S 4, bottom row), again associated with the formation of  $\text{LiOH}$  and  $\text{LiOH}\cdot\text{H}_2\text{O}$ .

To further understand the reactivity of  $\text{Al}_2\text{O}_3$ -coated metallic Li in contact with superconcentrated aqueous electrolytes, GC-TCD measurements were performed alike the ones carried out for the LiF-protected samples. Upon exposure to 20 m LiTFSI, a constant evolution of  $\text{H}_2$  is observed during 2 hours with a concentration of ar. 0.15 % of  $\text{H}_2$  in the headspace (Figure S 4b). While this concentration is much smaller than the one observed previously with the LiF-protected Li electrode (Figure 3b), once normalized by the amount of Li taking into account the surface and the thickness of the metallic Li electrode, one can estimate that 18 % of the metallic Li was consumed by the reaction. Thus, as observed by operando SEM and postmortem XRD, the conformal coating of  $\text{Al}_2\text{O}_3$  does not prevent metallic Li from reacting with WiSE aqueous electrolyte but slows down the reaction. Finally, alike for LiF-protected samples, upon exposure to 20 m LiTFSI : 8 m LiBETI electrolyte, the

concentration of  $\text{H}_2$  measured by GC-TCD is 2 to 3 times lower than that measured in 20 m LiTFSI electrolyte. Nevertheless, the concentration of gas keeps increasing upon measurement, indicating a continuous degradation of the coating and a greater reactivity of the underneath Li electrode. Eventually, 6.4 % of Li is estimated to be consumed after 2 hours.

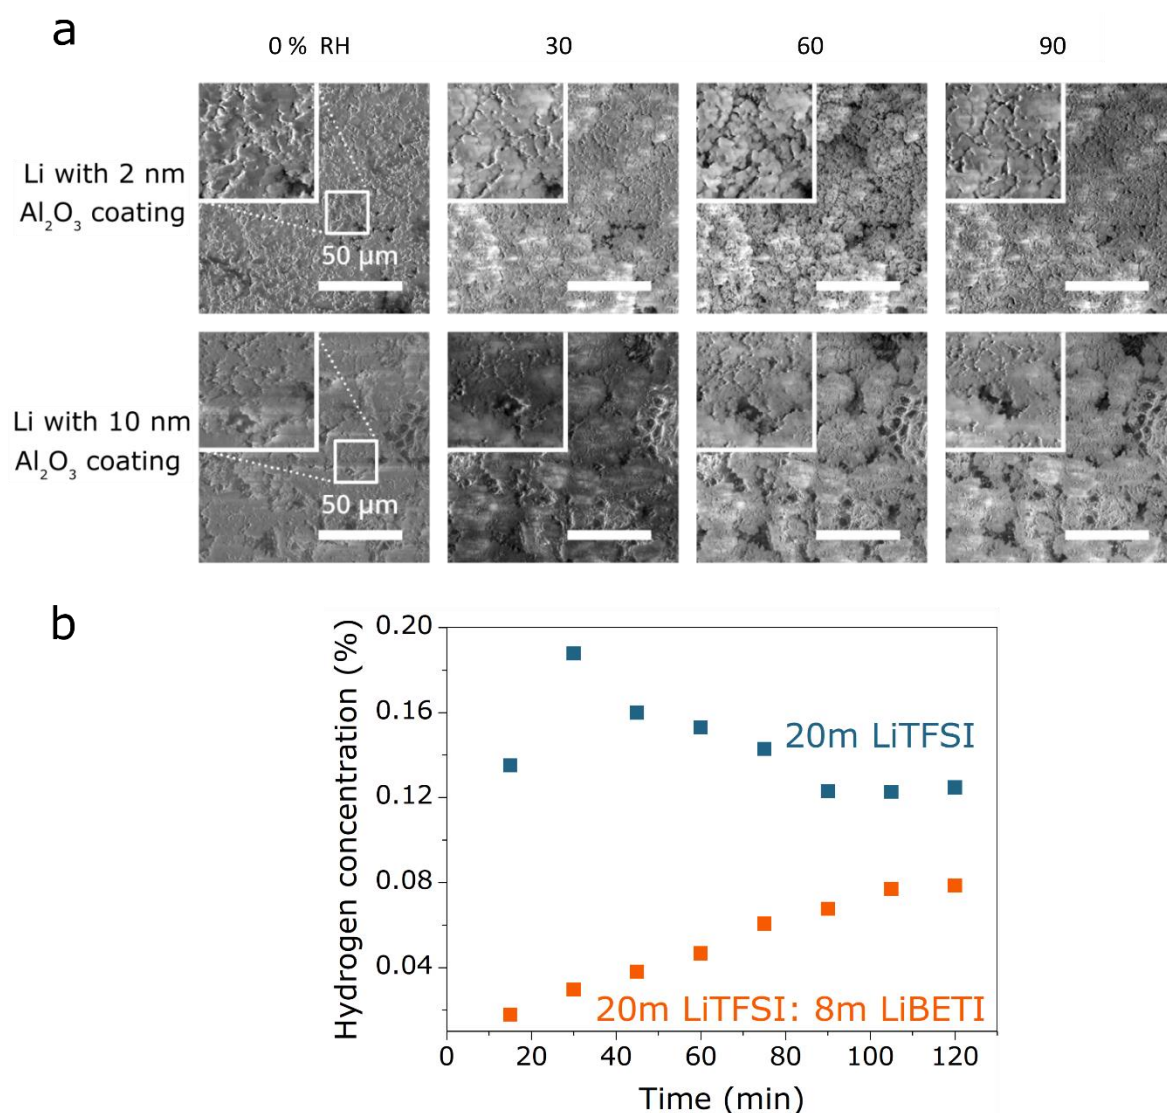

Figure S 4 (a) SEM images for 2 nm (top) and 10 nm (bottom)  $\text{Al}_2\text{O}_3$  coated metallic Li taken successively at 0, 30, 60 and 90 % RH with zoom-ins. (b) Gas evolution as a function of time for 10 nm  $\text{Al}_2\text{O}_3$ -coated metallic Li samples after exposure to 20 m LiTFSI (*blue*) and 20 m LiTFSI : 8 m LiBETI (*orange*) aqueous superconcentrated electrolytes.

- Partial dissolution of LiF-coating layer when soaking in FEC, Li 1s and F 1s XPS measurements

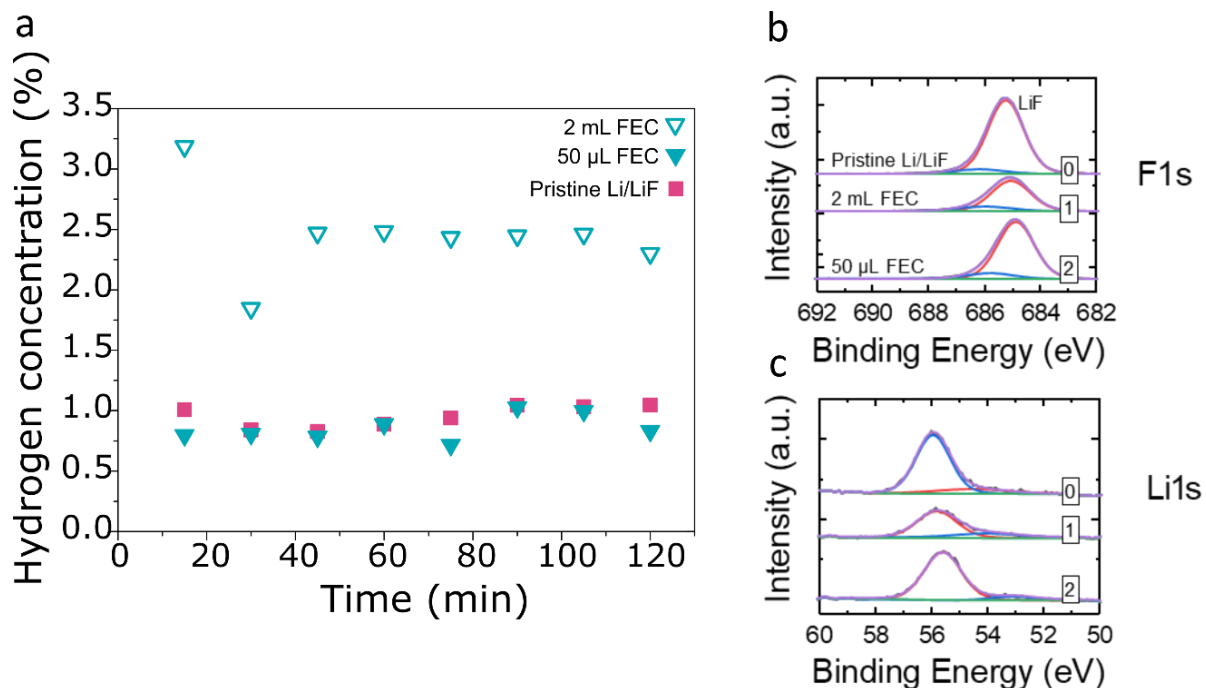

Figure S 5 (a) Hydrogen evolution as function of time for pristine Li/LiF sample (pink), pre-soaked in 2 mL FEC (light blue, empty triangle), pre-soaked in 50  $\mu$ L FEC (light blue, full triangle) prior to exposure to 20 m LiTFSI : 8 m LiBETI aqueous superconcentrated electrolyte (WiBS). X-ray photoelectron spectroscopy (XPS) spectrum of (b) F 1s and c. Li 1s of pristine Li/LiF (0), pre-soaked Li/LiF sample in 2 mL FEC (1), pre-soaked Li/LiF sample in 50  $\mu$ L FEC (2).

- Surface chemistry analysis after pre-soaking step, XPS measurements

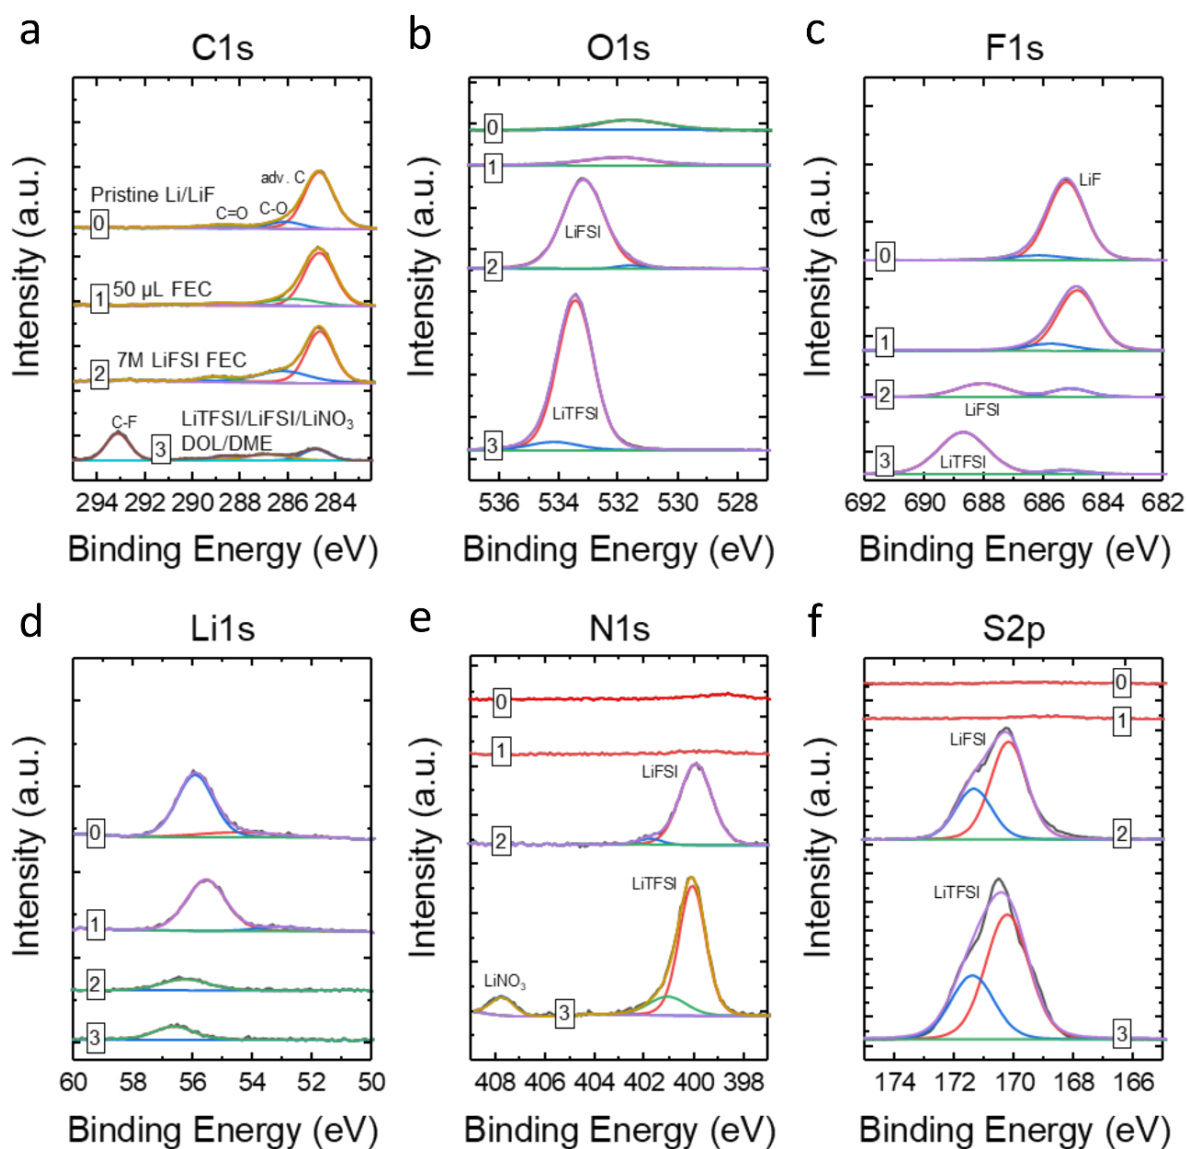

Figure S 6 X-ray photoelectron spectroscopy (XPS) spectrum of (a) C 1s, (b) O 1s, (c) F 1s, (d) Li 1s, (e) N 1s, (f) S 2p of pristine Li/LiF (0), pre-soaked in 50  $\mu$ L FEC (1), pre-soaked in 7 M LiFSI (2) and pre-soaked in 2 M LiFSI : 1 M LiTFSI in DOL/DME, 3 %  $\text{LiNO}_3$  (3).

- *Li/LiF coating exposure to WiSE, GC-TCD experiment*

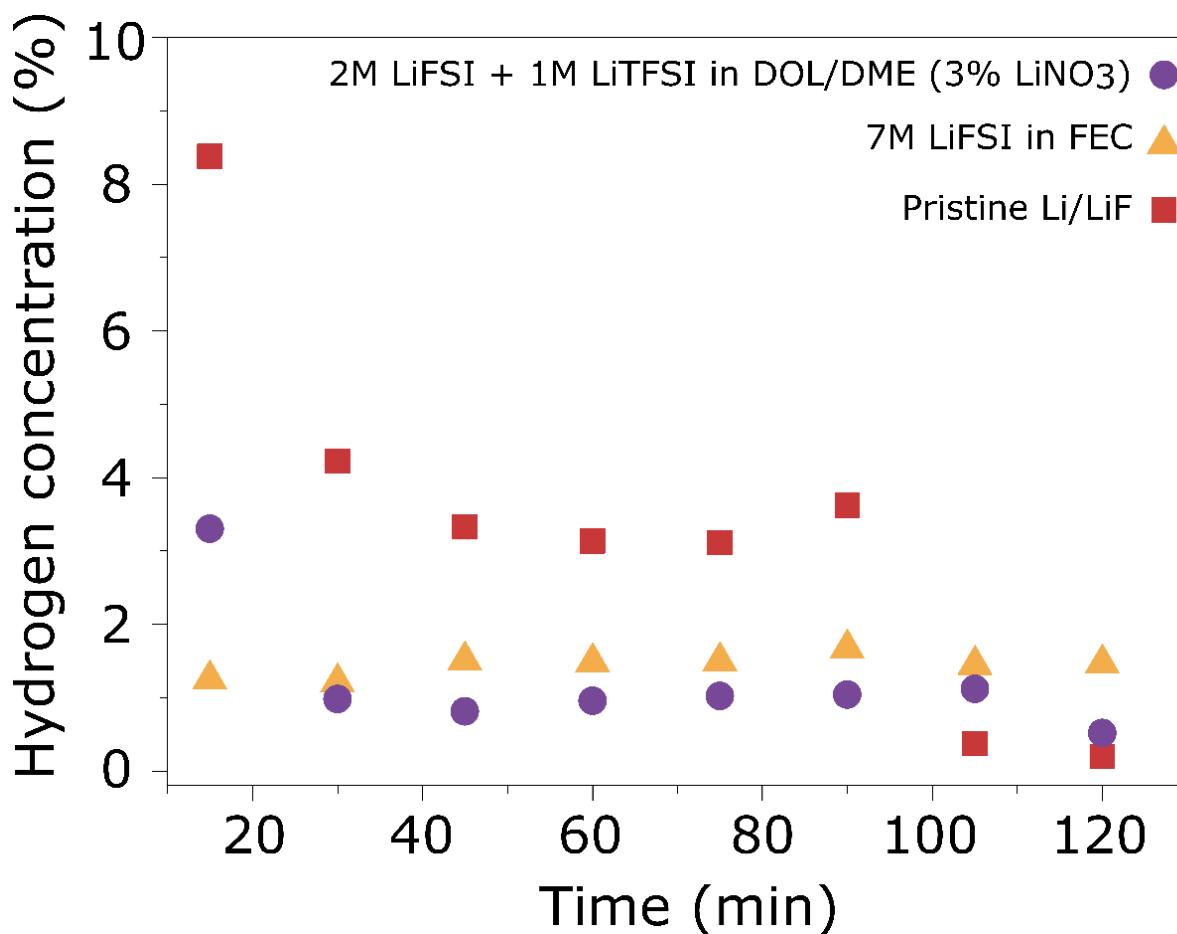

Figure S 7 Hydrogen evolution as function of time for pristine Li/LiF sample (red), pre-soaked in 7 M LiFSI in FEC (yellow), pre-soaked in 2 M LiFSI : 1 M LiTFSI in DOL/DME (purple) prior to exposure to 20 m LiTFSI aqueous superconcentrated electrolyte (WiSE).

The Li consumption of LiF-coated Li samples exposed to WiSE fades from 74 % for the pristine sample to 27 % in 1 M LiTFSI : 2 M LiFSI in DOL/DME and 33 % in 7 M LiFSI in FEC, respectively.

Furthermore, trends observed for both organic electrolytes are similar than in WiBS. In details, after 15 min exposure to WiSE, the hydrogen concentration measured for the sample soaked in 1 M LiTFSI : 2 M LiFSI in DOL/DME increases to ar. 3 % then stabilizes at ar. 1 % while it is mostly constant during the two hours experiment after soaking in 7 M LiFSI in FEC. However, one can notice that although the decrease of Li consumption is significant, the differences recorded between these two soaking steps is less remarkable than in WiBS and the Li

consumption is still greater than the one of the Li/LiF sample exposed to WiBS. One possible explanation would be the difference of kinetics for such electrolyte penetration being dependent on its viscosity and the mass transport across the microporosity and/or cracks leading to a faster access of water in the case of WiSE and preventing from greater performances.

- Gas calculation

Based on the GC-TCD results, one can assess the consumption of Li after the sample had been exposed 120 min to WiSE or WiBS.

Table S 2 Experimental parameters

| Volum<br>e of<br>the cell<br><br>V <sub>cell</sub><br>(mL) | Total<br>pressur<br>e<br><br>P <sub>tot</sub><br>(bar) | Temperatur<br>e<br><br>T (°C) | Ideal gas<br>constant<br><br>R<br>(J/(mol.K)<br>) | Thickness<br>of Li foil*<br><br>e (μm) |                                | Diameter<br>of Li foil<br><br>Ø (mm) |                                | Li<br>density<br><br>ρ<br>(g/cm <sup>3</sup><br>) | Molar<br>mass<br>of Li<br><br>M<br>(g/mol<br>) |
|------------------------------------------------------------|--------------------------------------------------------|-------------------------------|---------------------------------------------------|----------------------------------------|--------------------------------|--------------------------------------|--------------------------------|---------------------------------------------------|------------------------------------------------|
| 5.5                                                        | 3.06                                                   | 20                            | 8.314                                             | LiF                                    | Al <sub>2</sub> O <sub>3</sub> | Li<br>F                              | Al <sub>2</sub> O <sub>3</sub> | 0.534                                             | 6.941                                          |
|                                                            |                                                        |                               |                                                   | 10<br>0                                | 30.5                           | 9                                    | 7                              |                                                   |                                                |

\*based on SEM observation

$$n_{cell}^{gas} = \frac{P_{tot} * V_{cell}}{R * T} = 689.8 \mu mol$$

$$n_{Li\ foil} = \frac{\rho * \pi * \varnothing^2 * e}{4 * M} = 489 \mu mol (LiF) \text{ or } 90 \mu mol (Al_2O_3)$$

$$n_{Hydrogen} = n_{cell}^{gas} * x_{Hydrogen}$$

$$Ratio\ of\ Li\ consumed = \frac{2 * n_{Hydrogen}}{n_{Li\ foil}}$$

\*The molar ratio of hydrogen ( $x_{Hydrogen}$ ) is obtained from the sum of the amount of H<sub>2</sub> measured after each 15min interval.

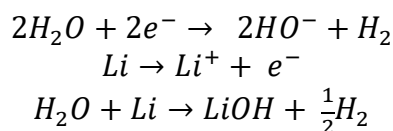

Table S 3 Aqueous superconcentrated electrolytes properties

|                                                         | WiSE  | WiBS               |
|---------------------------------------------------------|-------|--------------------|
| Density (g/mL)                                          | 1.696 | 1.783 <sup>2</sup> |
| Mass ratio of water ( $W_{H_2O}$ )                      | 0.148 | 0.10               |
| Amount of water in 250 $\mu$ L<br>of electrolyte (mmol) | 3.49  | 2.48               |

**LiF sample:**

$$n_{Li\ foil} = 489\ \mu mol$$

Table S 4 Consumption of Li after exposure to 20 m LiTFSI (WiSE) for the Li/LiF-coated samples: pristine, pre-soaked in 7 M LiFSI in FEC or 2 M LiFSI : 1 M LiTFSI in DOL:DME, 3 % LiNO<sub>3</sub> assuming HER as sole source for hydrogen evolution in Li consumption ratio calculation.

| Exposure to 20 m LiTFSI                                                         | Molar ratio of H <sub>2</sub><br>(after 120 min)<br><br>x <sub>Hydrogen</sub> (%) | Amount of H <sub>2</sub><br>released (after<br>120 min)<br><br>n <sub>Hydrogen</sub> (μmol) | Ratio of Li<br>consumed<br>(after 120<br>min)<br>(%) |
|---------------------------------------------------------------------------------|-----------------------------------------------------------------------------------|---------------------------------------------------------------------------------------------|------------------------------------------------------|
| Li/LiF pristine                                                                 | 26.35                                                                             | 182                                                                                         | 74                                                   |
| Li/LiF pre-soaked in 7 M LiFSI in<br>FEC                                        | 11.53                                                                             | 80                                                                                          | 33                                                   |
| Li/LiF pre-soaked in 2 M LiFSI : 1<br>M LiTFSI in DOL/DME, 3% LiNO <sub>3</sub> | 7.94                                                                              | 67                                                                                          | 27                                                   |

Table S 5 Consumption of Li after *exposure* to 20 m LiTFSI : 8 m LiBETI (WiBS) for the Li/LiF – coated pristine Li/LiF, pre-soaked in 2 mL FEC, pre-soaked in 50 μL FEC, pre-soaked in 7 M LiFSI in FEC or 2 M LiFSI : 1 M LiTFSI in DOL:DME, 3 % LiNO<sub>3</sub> assuming hydrogen evolution only caused by HER in Li consumption ratio calculation.

| Exposure to 20 m LiTFSI : 8 m<br>LiBETI                                                     | Molar ratio of H <sub>2</sub><br>(after 120min)<br><br>x <sub>Hydrogen</sub> (%) | Amount of H <sub>2</sub><br>released (after<br>120min)<br><br>n <sub>Hydrogen</sub> (μmol) | Ratio of Li<br>consumed (after<br>120min)<br>(%) |
|---------------------------------------------------------------------------------------------|----------------------------------------------------------------------------------|--------------------------------------------------------------------------------------------|--------------------------------------------------|
| Li/LiF pristine                                                                             | 7.63                                                                             | 53                                                                                         | 22                                               |
| Li/LiF pre-soaked in 2 mL pure<br>FEC                                                       | 19.6                                                                             | 135                                                                                        | 55                                               |
| Li/LiF pre-soaked in 50 μL pure<br>FEC                                                      | 6.85                                                                             | 47                                                                                         | 19                                               |
| Li/LiF pre-soaked in 50 μL of 7<br>M LiFSI in FEC                                           | 1.41                                                                             | 10                                                                                         | 4                                                |
| Li/LiF pre-soaked in 50 μL of 2<br>M LiFSI + 1 M LiTFSI in<br>DOL/DME, 3% LiNO <sub>3</sub> | 6.44                                                                             | 44                                                                                         | 18                                               |

**Al<sub>2</sub>O<sub>3</sub> sample:**

$$n_{Li\ foil} = 90\ \mu mol$$

Table S 6 Consumption of Li after exposure to 20 m LiTFSI (WiSE) or 20m LiTFSI : 8 m LiBETI (WiBS)

|                                          | Molar ratio of H <sub>2</sub> (after 120min)<br><br>X <sub>Hydrogen</sub> (%) | Amount of H <sub>2</sub> released (after 120min)<br><br>n <sub>Hydrogen</sub> (μmol) | Ratio of Li consumed (after 120min)<br>(%) |
|------------------------------------------|-------------------------------------------------------------------------------|--------------------------------------------------------------------------------------|--------------------------------------------|
| Li/LiF exposed to 20m LiTFSI             | 1.15                                                                          | 7.933                                                                                | 18                                         |
| Li/LiF exposed to 20m LiTFSI : 8m LiBETI | 0.416                                                                         | 2.867                                                                                | 6.4                                        |

- **Estimation of cycle life considering the water consumption assess by GC-TCD**

Table S 7 Estimation of water and Li consumption according to the gassing measured by GC-TCD

| Case                                                                   | LiF-coated Li, cracks filled with 7M LiFSI in FEC, exposure to WiSE | LiF-coated Li cracks filled with 7M LiFSI in FEC, exposure to WiBS | Mo <sub>6</sub> S <sub>8</sub> electrode used in WiSE |
|------------------------------------------------------------------------|---------------------------------------------------------------------|--------------------------------------------------------------------|-------------------------------------------------------|
| Water consumption (μmol <sub>H<sub>2</sub>O</sub> /h)                  | 80                                                                  | 10                                                                 | 0.1                                                   |
| Water amount in 250 μL of electrolyte (mmol)                           | 3.49                                                                | 2.48                                                               | 3.49                                                  |
| Time (h) needed to consume water                                       | 44                                                                  | 248                                                                | 35 000                                                |
| Number of cycle considering 1C C-rate (1 Li <sup>+</sup> inserted / h) | <50                                                                 | <250                                                               | 8750                                                  |
| Li amount used in the study (μmol)                                     | 489                                                                 | 489                                                                | /                                                     |
| Time (h) needed to consume Li                                          | 6.1                                                                 | 48.9                                                               | /                                                     |

## References

- (1) Jones, J.; Anouti, M.; Caillon-Caravanier, M.; Willmann, P.; Sizaret, P.-Y.; Lemordant, D. Solubilization of SEI Lithium Salts in Alkylcarbonate Solvents. *Fluid Phase Equilibria* **2011**, *305* (2), 121–126. <https://doi.org/10.1016/j.fluid.2011.03.007>.
- (2) Jones, J.; Anouti, M.; Caillon-Caravanier, M.; Willmann, P.; Lemordant, D. Thermodynamic of LiF Dissolution in Alkylcarbonates and Some of Their Mixtures with Water. *Fluid Phase Equilibria* **2009**, *285* (1–2), 62–68. <https://doi.org/10.1016/j.fluid.2009.07.020>.
- (3) Tasaki, K.; Goldberg, A.; Lian, J.-J.; Walker, M.; Timmons, A.; Harris, S. J. Solubility of Lithium Salts Formed on the Lithium-Ion Battery Negative Electrode Surface in Organic Solvents. *J. Electrochem. Soc.* **2009**, *156* (12), A1019. <https://doi.org/10.1149/1.3239850>.
- (4) He, M.; Guo, R.; Hobold, G. M.; Gao, H.; Gallant, B. M. The Intrinsic Behavior of Lithium Fluoride in Solid Electrolyte Interphases on Lithium. *Proc Natl Acad Sci USA* **2020**, *117* (1), 73–79. <https://doi.org/10.1073/pnas.1911017116>.
- (5) Chen, L.; Cao, L.; Ji, X.; Hou, S.; Li, Q.; Chen, J.; Yang, C.; Eidson, N.; Wang, C. Enabling Safe Aqueous Lithium Ion Open Batteries by Suppressing Oxygen Reduction Reaction. *Nat Commun* **2020**, *11* (1), 2638. <https://doi.org/10.1038/s41467-020-16460-w>.
